# Supplementary material
Source: MDPI journal article supplement (https://www.mdpi.com/2072-4292/11/24/2964)

**Supplementary Materials:**

Figure S1. Green area (GA) and chlorophyll content measured with an SPAD chlorophyll-meter on second leaves/stipules of the pea cultivars Terno (TER), Enduro (END), CDC Le Roy (CDC) and Arkta (ARK) before the cold treatment (Day 0). Different letters indicate statistically significant differences among the cultivars (Holm-Sidak or Tukey tests;  $P < 0.05$ ).

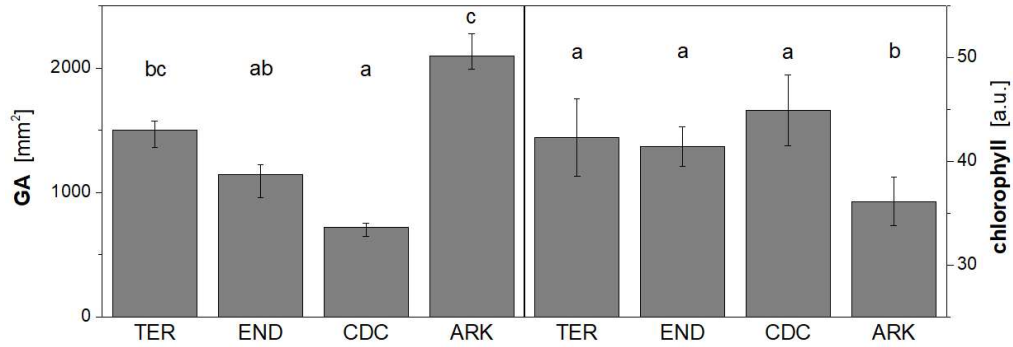

Figure S2. Number of plants that exhibited unfolded third leaf/stipule. We counted plants with fully opened third leaves in each time point during cold-treatment. Whereas ARK opened the third leaves immediately after the beginning of cold-treatment, other cultivars opened the third stipules later but gradually during entire time of cold treatment. This suggests that ARK opened third leaves as response to previous optimal conditions, but then block its development (as seen also from RGR data), whereas other cultivars do not respond to cold so dramatically and continued in development even under suboptimal conditions.

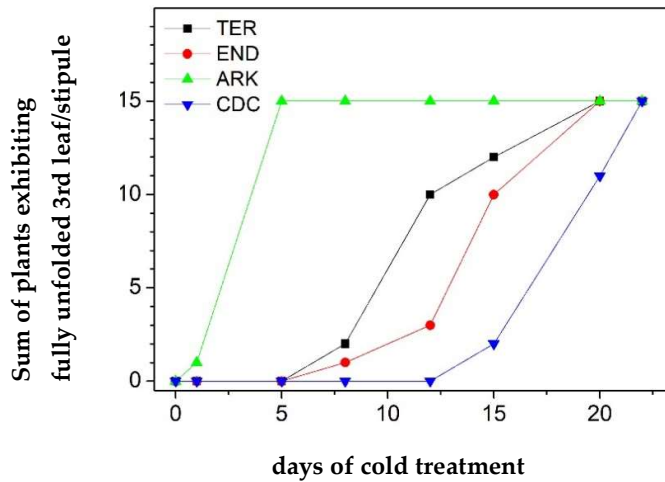

Supplement: s1 [file s1]
